# Supplementary material for: Progressive Decline in Estimated Glomerular Filtration Rate in Patients With Diabetes After Moderate Loss in Kidney Function—Even Without Albuminuria
Source: Oxford University Press journal article supplement (doi:10.2337/dc19-0349), 2019-06-20

# SUPPLEMENTARY DATA

**Supplementary Table S1.** Estimated average eGFR levels (95%CI) following a first recorded eGFR just below 60 mL/min/1.73m<sup>2</sup> and mean annual change (95%CI) in eGFR (mL/min/1.73m<sup>2</sup>) in the first 10-year period following baseline, by diabetes type and albuminuria status

|                                        | Type 1 diabetes                              |             |             |               |         | Type 2 diabetes                              |                  |                  |               |             |
|----------------------------------------|----------------------------------------------|-------------|-------------|---------------|---------|----------------------------------------------|------------------|------------------|---------------|-------------|
|                                        | Estimated eGFR at times since first low eGFR |             |             | Annual change |         | Estimated eGFR at times since first low eGFR |                  |                  | Annual change |             |
|                                        | 1 year                                       | 5 years     | 10 years    |               |         | 1 year                                       | 5 years          | 10 years         |               |             |
| <u>Total study population</u>          |                                              |             |             |               |         |                                              |                  |                  |               |             |
| <i>Model 1</i>                         |                                              |             |             |               |         |                                              |                  |                  |               |             |
| Normoalbuminuria                       | 61.4 (58.8;64.1)                             | 52.2        | 41.6        | -1.8          | (-2.1;- | 61.4 (60.2;62.7)                             | 50.9 (49.6;52.1) | 41.1 (39.6;42.6) | -1.9          | (-2.0;-1.7) |
|                                        |                                              | (49.9;54.8) | (39.2;44.3) | 1.6)          |         |                                              |                  |                  |               |             |
| Microalbuminuria                       | 59.7 (57.1;62.7)                             | 49.0        | 37.5        | -2.3          | (-2.5;- | 60.0 (58.7;61.4)                             | 49.5 (48.3;50.9) | 39.0 (37.5;40.6) | -2.1          | (-2.3;-1.9) |
|                                        |                                              | (46.6;51.6) | (35.3;40.3) | 2.0)          |         |                                              |                  |                  |               |             |
| Macroalbuminuria                       | 54.0 (50.9;57.2)                             | 38.8        | 26.8        | -3.3          | (-3.6;- | 58.0 (56.4;59.7)                             | 43.7 (42.3;45.1) | 30.4 (28.9;32.0) | -3.0          | (-3.1;-2.8) |
|                                        |                                              | (36.4;41.5) | (24.5;29.6) | 3.0)          |         |                                              |                  |                  |               |             |
| <i>Model 2</i>                         |                                              |             |             |               |         |                                              |                  |                  |               |             |
| Normoalbuminuria                       | 61.6 (58.9;64.6)                             | 52.3        | 41.2        | -1.9          | (-2.1;- | 61.6 (60.1;63.1)                             | 51.0 (49.6;52.4) | 41.1 (39.5;42.9) | -1.9          | (-2.0;-1.7) |
|                                        |                                              | (49.8;55.0) | (38.5;44.0) | 1.6)          |         |                                              |                  |                  |               |             |
| Microalbuminuria                       | 60.0 (56.9;63.1)                             | 49.4        | 37.6        | -2.2          | (-2.5;- | 60.2 (58.7;61.7)                             | 49.8 (48.4;51.3) | 39.4 (37.8;41.2) | -2.1          | (-2.2;-1.9) |
|                                        |                                              | (46.9;52.2) | (34.9;40.2) | 2.0)          |         |                                              |                  |                  |               |             |
| Macroalbuminuria                       | 54.7 (51.3;58.0)                             | 39.8        | 27.5        | -3.3          | (-3.5;- | 58.5 (56.9;60.0)                             | 44.6 (43.2;46.2) | 31.5 (30.0;33.2) | -2.9          | (-3.0;-2.7) |
|                                        |                                              | (37.4;42.8) | (25.0;30.2) | 3.0)          |         |                                              |                  |                  |               |             |
| <u>Normoalbuminuric latent classes</u> |                                              |             |             |               |         |                                              |                  |                  |               |             |
| Class 1 (frequent)                     | 65.3 (63.3;67.4)                             | 58.2        | 48.6        | -1.1          | (-1.5;- | 62.0 (60.7;63.3)                             | 53.5 (52.2;54.9) | 42.8 (40.8;45.1) | -1.7          | (-1.9;-1.5) |
|                                        |                                              | (55.9;60.6) | (45.2;52.5) | 0.8)          |         |                                              |                  |                  |               |             |
| Class 2 (infrequent)                   | 55.6 (53.6;57.7)                             | 49.2        | 46.1        | -1.4          | (-1.8;- | 59.2 (57.7;60.8)                             | 52.3 (50.4;54.5) | 53.4 (49.6;57.8) | -0.7          | (-1.0;-0.2) |
|                                        |                                              | (46.8;51.7) | (42.1;51.1) | 0.9)          |         |                                              |                  |                  |               |             |

Model 1: adjustment for sex, age at diabetes diagnosis, diabetes duration and calendar time

Model 2: additional adjustment for use of renin-angiotensin system blockers, retinopathy status, HbA<sub>1c</sub>, antihypertensive treatment, blood pressure, current smoking and lipid-lowering treatment

# SUPPLEMENTARY DATA

**Supplementary Table S2.** Performance measures for the latent class trajectory model by number of classes for type 1 diabetes with normoalbuminuria

| <b>Solution</b> | <b>BIC</b> | <b>AIC</b> | <b>Relative entropy</b> | <b>Mean posterior probability</b> | <b>Size of smallest class (n (%))</b> |
|-----------------|------------|------------|-------------------------|-----------------------------------|---------------------------------------|
| 1-class         | -1455.68   | -1555.28   | -                       | -                                 | -                                     |
| 2-class         | -1565.11   | -1688.62   | 0.773                   | $\geq 0.846$                      | 55 (13.9%)                            |
| 3-class         | -1594.57   | -1741.98   | 0.782                   | $\geq 0.824$                      | 13 (3.3%)                             |
| 4-class         | -1605.71   | -1777.02   | 0.831                   | $\geq 0.858$                      | 9 (2.3%)                              |
| 5-class         | -1613.49   | -1808.70   | 0.810                   | $\geq 0.730$                      | 8 (2.0%)                              |

BIC: Bayesian information criterion; AIC: Akaike information criterion

# SUPPLEMENTARY DATA

**Supplementary Table S3.** Performance measures for the latent class trajectory model by number of classes for type 2 diabetes with normoalbuminuria

| <b>Solution</b> | <b>BIC</b> | <b>AIC</b> | <b>Relative entropy</b> | <b>Mean posterior probability</b> | <b>Size of smallest class (n (%))</b> |
|-----------------|------------|------------|-------------------------|-----------------------------------|---------------------------------------|
| 1-class         | -2175.54   | -2294.37   | -                       | -                                 | -                                     |
| 2-class         | -2395.459  | -2542.816  | 0.857                   | $\geq 0.891$                      | 88 (10.3%)                            |
| 3-class         | -2495.689  | -2671.567  | 0.736                   | $\geq 0.789$                      | 46 (5.4%)                             |
| 4-class         | -2510.761  | -2715.159  | 0.686                   | $\geq 0.672$                      | 19 (2.2%)                             |
| 5-class         | -2533.925  | -2766.843  | 0.745                   | $\geq 0.745$                      | 3 (0.4%)                              |

BIC: Bayesian information criterion; AIC: Akaike information criterion

## SUPPLEMENTARY DATA

**Supplementary Figure S1.** Estimated eGFR trajectories by diabetes type and level of model adjustment for persons with a first recorded low eGFR just below 60 mL/min/1.73m<sup>2</sup>. Time 0 is the first clinical visit with a recorded low eGFR. Curves are shown for persons with normoalbuminuria (light blue), microalbuminuria (dark blue) and macroalbuminuria (red). Solid lines are the estimated eGFR mean curves and shaded areas are the corresponding 95% confidence intervals. Horizontal grey lines show the thresholds for CKD stages. Model 1: adjustment for sex, age at diabetes diagnosis, diabetes duration and calendar time. Model 2: additional adjustment for use of renin-angiotensin system blockers, retinopathy status, HbA<sub>1c</sub>, antihypertensive treatment, blood pressure, current smoking and lipid-lowering treatment.

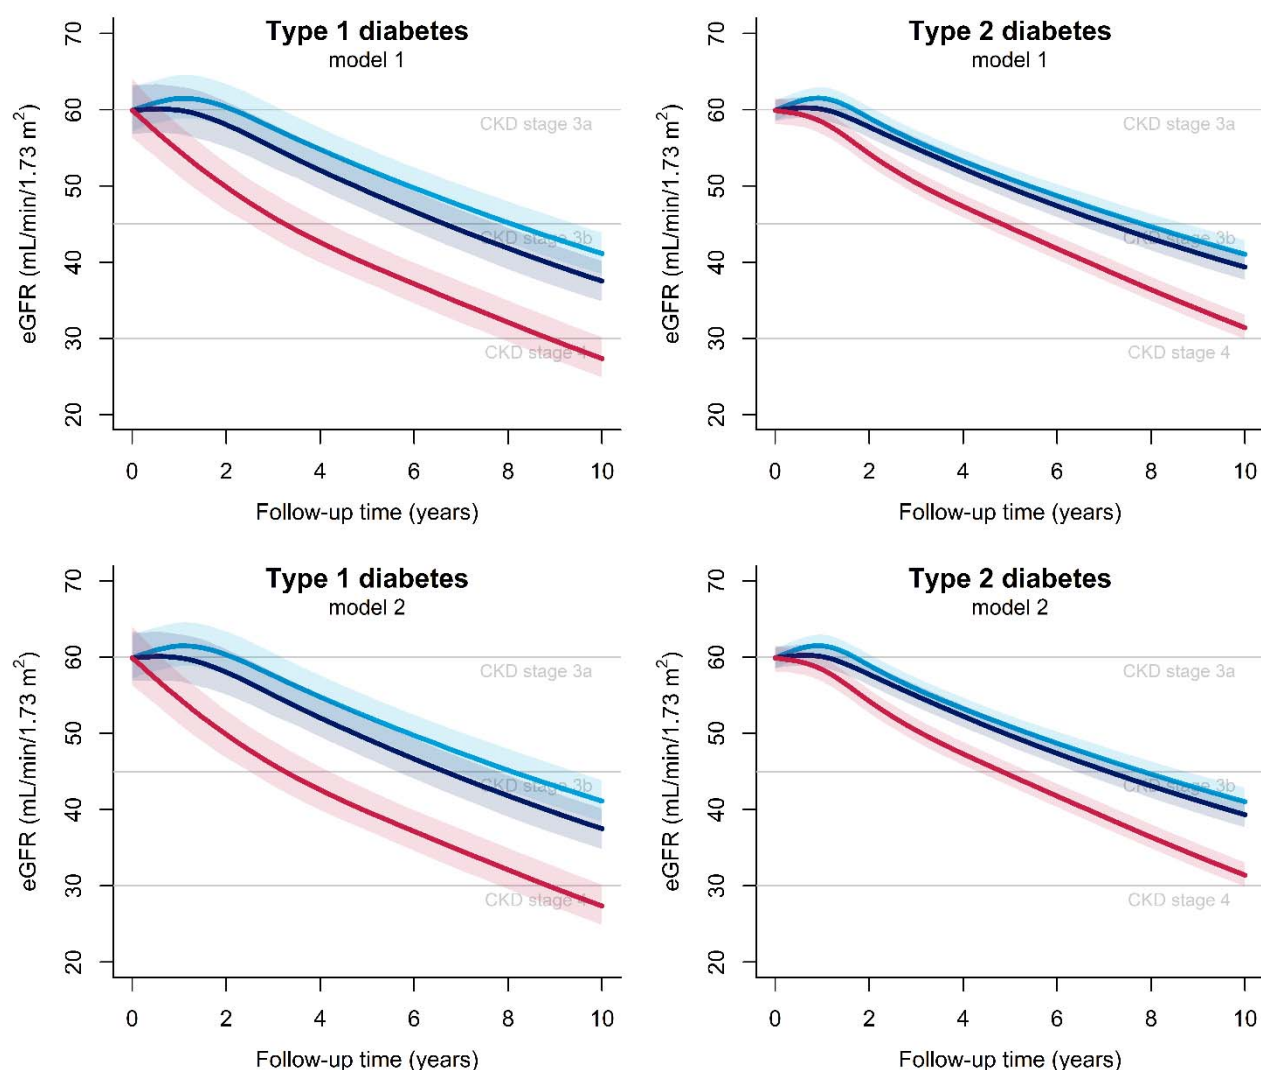

## SUPPLEMENTARY DATA

**Supplementary Figure S2.** Estimated eGFR trajectories by diabetes type for persons with a first recorded low eGFR just below  $70 \text{ mL/min/1.73m}^2$ . Time 0 is the first clinical visit with a recorded low eGFR. Curves are shown for persons with normoalbuminuria (light blue), microalbuminuria (dark blue) and macroalbuminuria (red). Solid lines are the estimated eGFR mean curves and shaded areas are the corresponding 95% confidence intervals. Horizontal grey lines show the thresholds for CKD stages. Curves are adjusted for sex, age at diabetes diagnosis, diabetes duration, calendar time, use of renin-angiotensin system blockers, retinopathy status,  $\text{HbA}_{1c}$ , antihypertensive treatment, blood pressure, current smoking and lipid-lowering treatment.

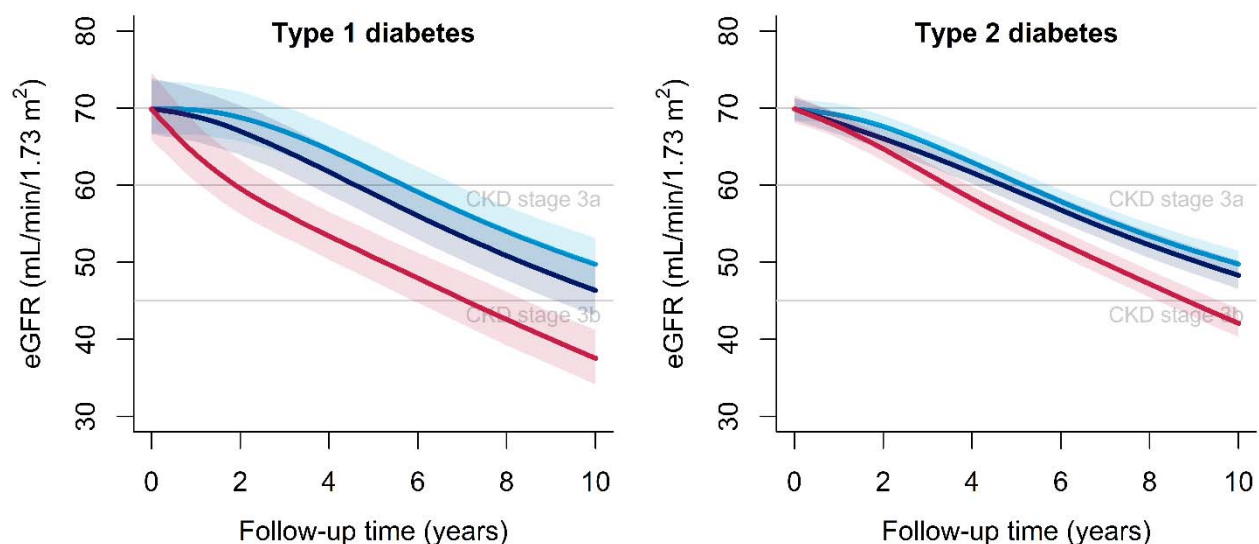

## SUPPLEMENTARY DATA

**Supplementary Figure S3.** Estimated eGFR trajectories for each latent class by number of classes for type 1 diabetes with normoalbuminuria who were also without albuminuria at baseline and with a first recorded low eGFR just below 60 mL/min/1.73m<sup>2</sup>. Time 0 is the first clinical visit with a recorded low eGFR. Horizontal grey lines show the thresholds for CKD stages.

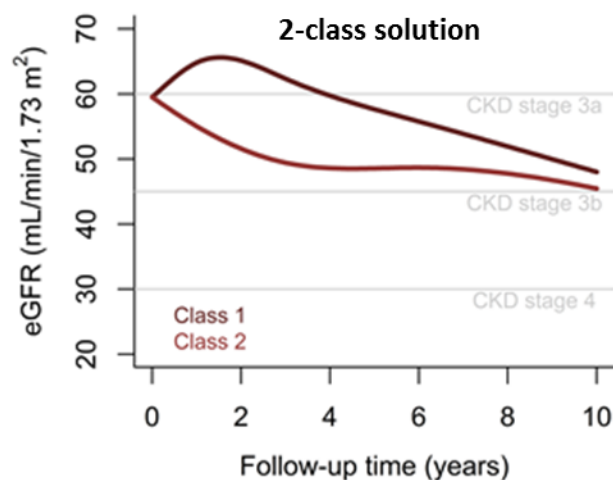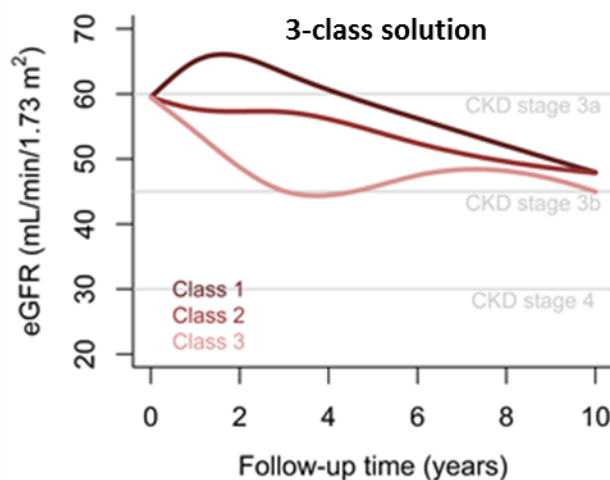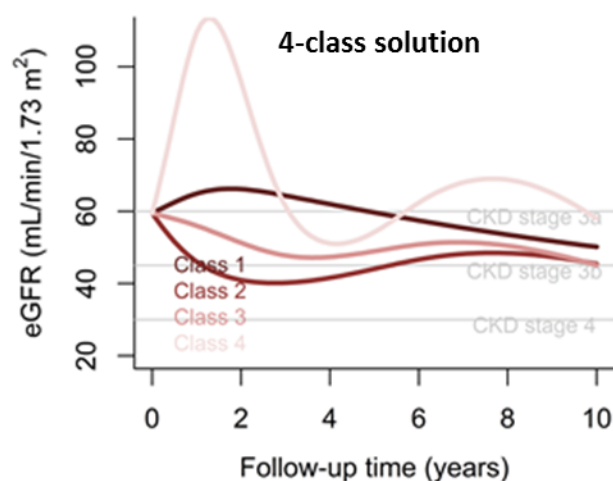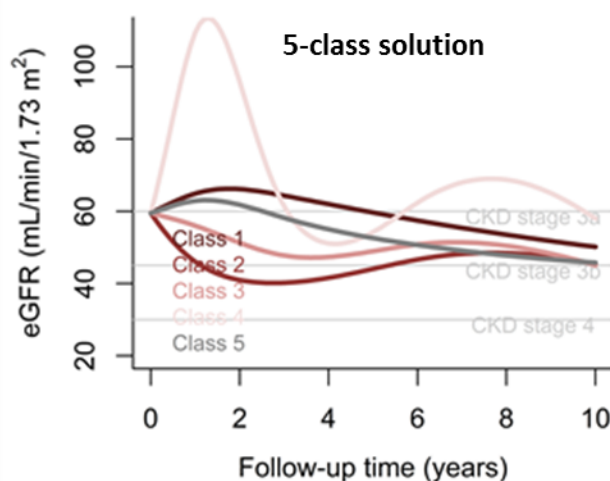

## SUPPLEMENTARY DATA

**Supplementary Figure S4.** Estimated eGFR trajectories for each latent class by number of classes for type 2 diabetes with normoalbuminuria who were also without albuminuria at baseline and with a first recorded low eGFR just below 60 mL/min/1.73m<sup>2</sup>. Time 0 is the first clinical visit with a recorded low eGFR. Horizontal grey lines show the thresholds for CKD stages.

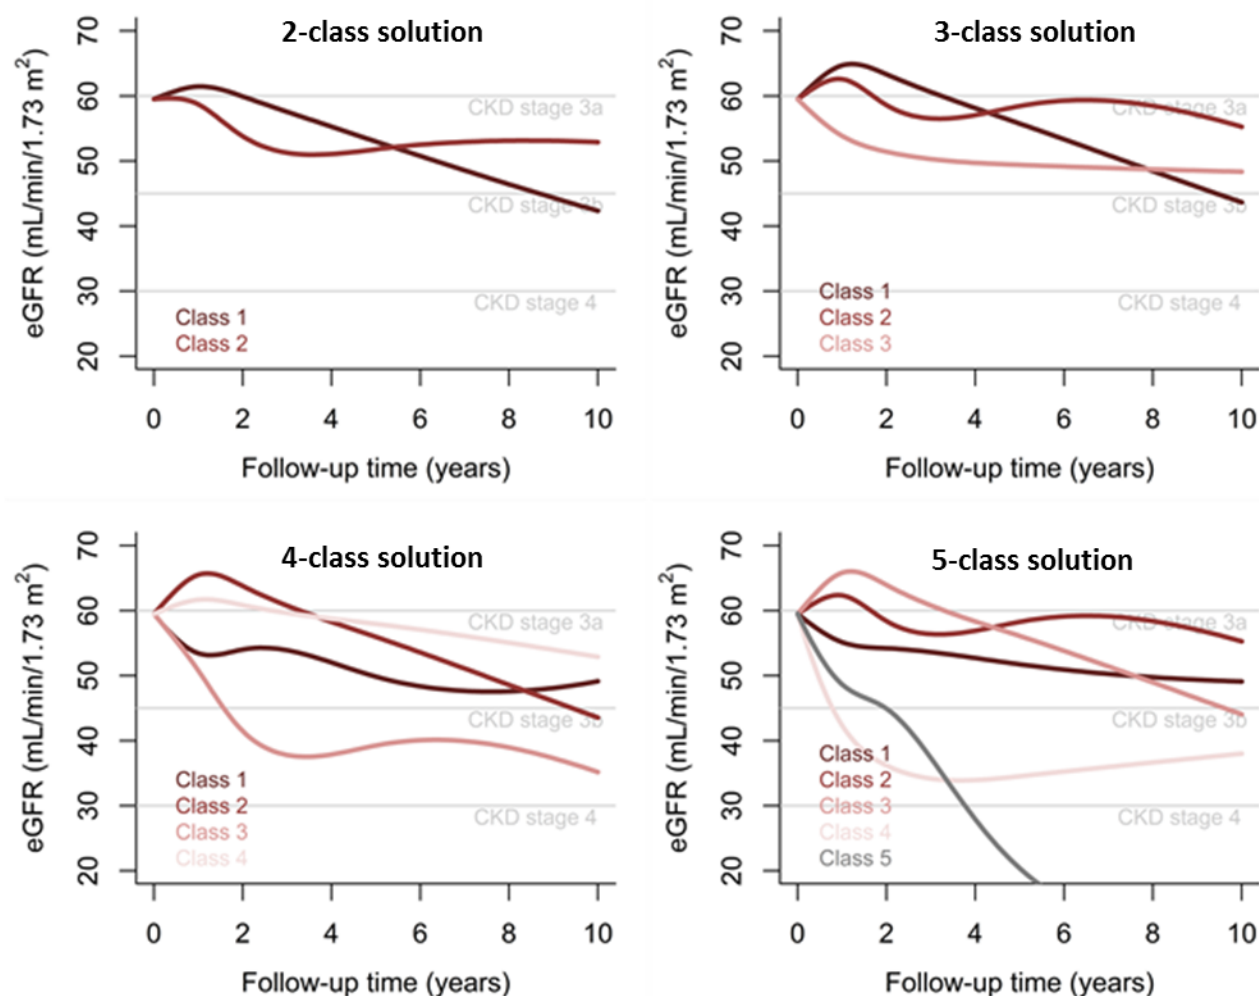

Supplement: dc190349supplementarydata.pdf [file dc190349supplementarydata.pdf]
